# Supplementary material for: Synergistic Combination of Luteolin and Asiatic Acid on Cervical Cancer In Vitro and In Vivo
Source: MDPI journal article supplement (doi:10.3390/cancers15020548), 2023-01-16

## **Supplementary Materials:**

**Synergistic combination of luteolin and asiatic acid on cervical cancer cells**

**Ya-Hui Chen, Jyun-Xue Wu, Shun-Fa Yang, Yi-Hsuan Hsiao**

Figure S1

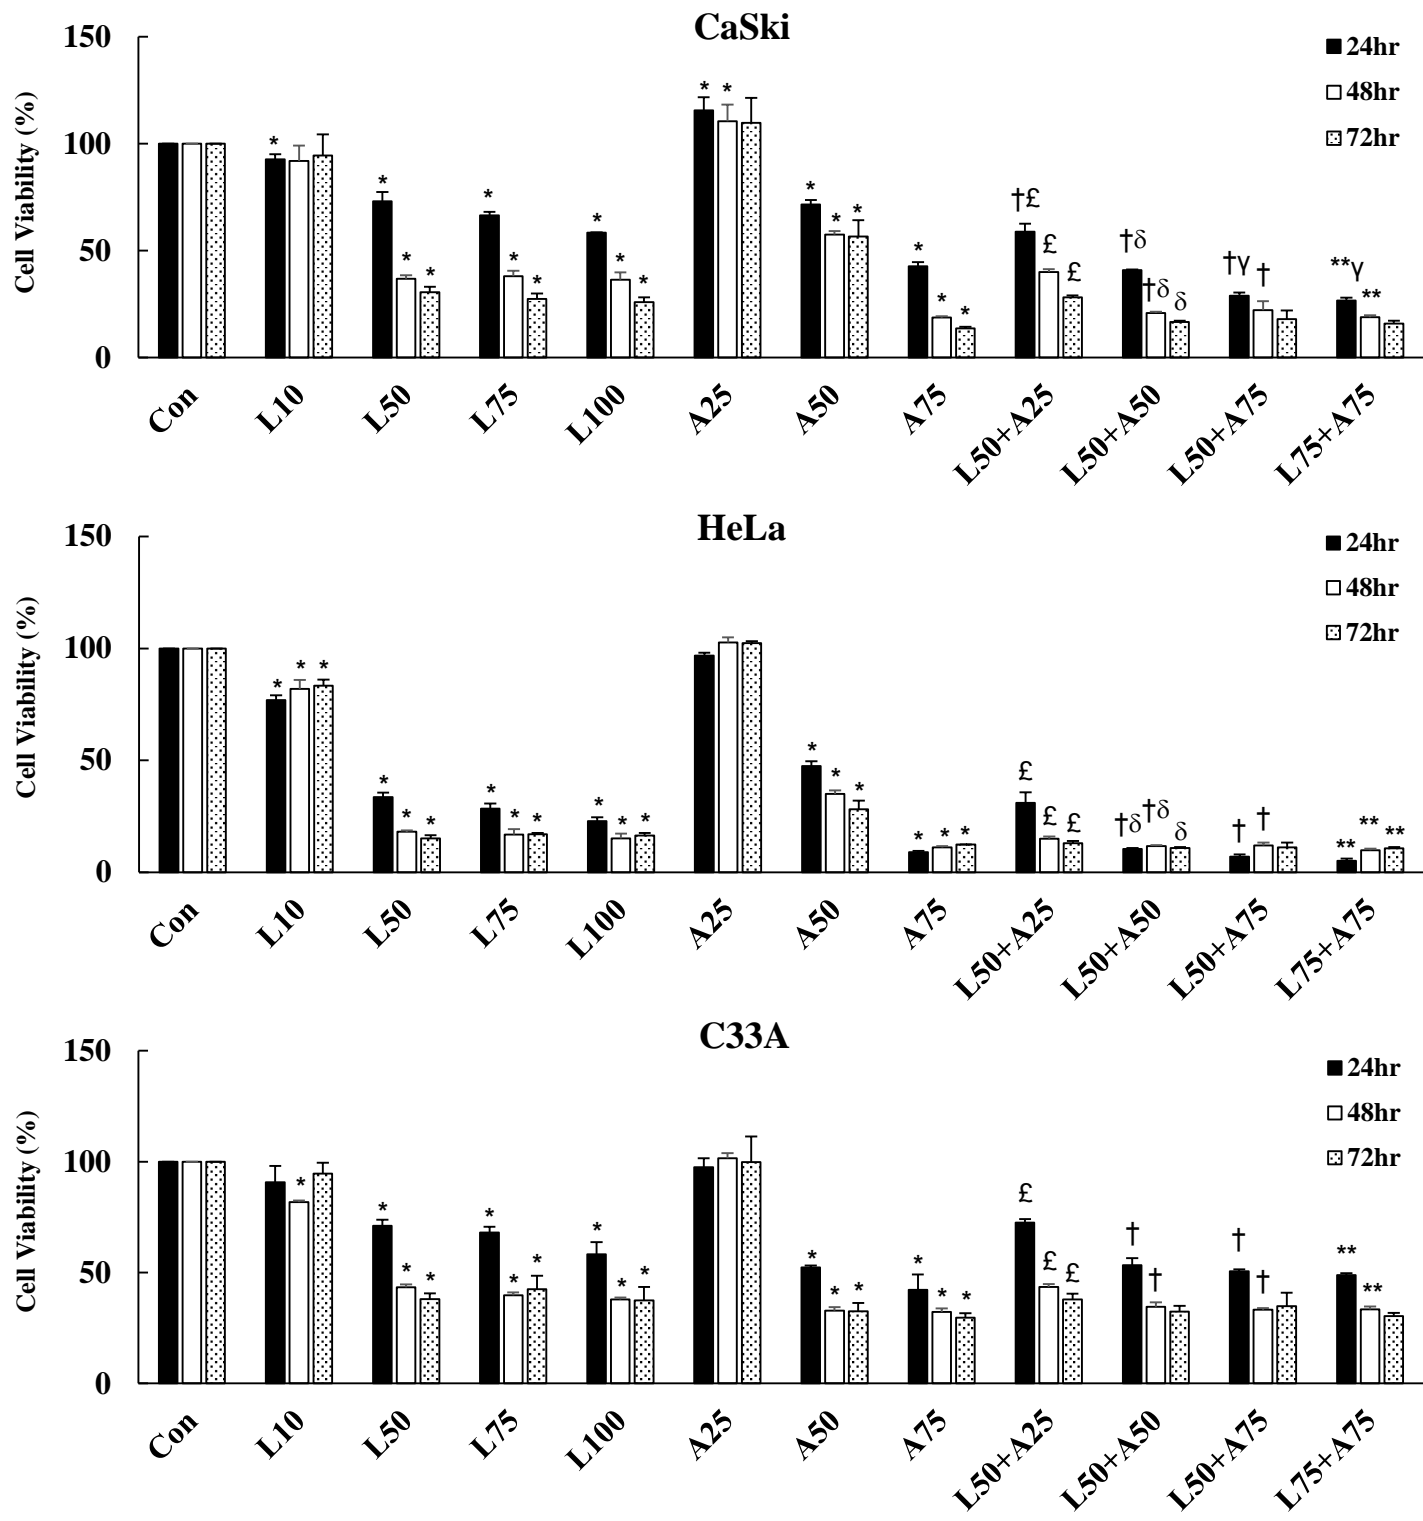

Figure S2A

CaSki

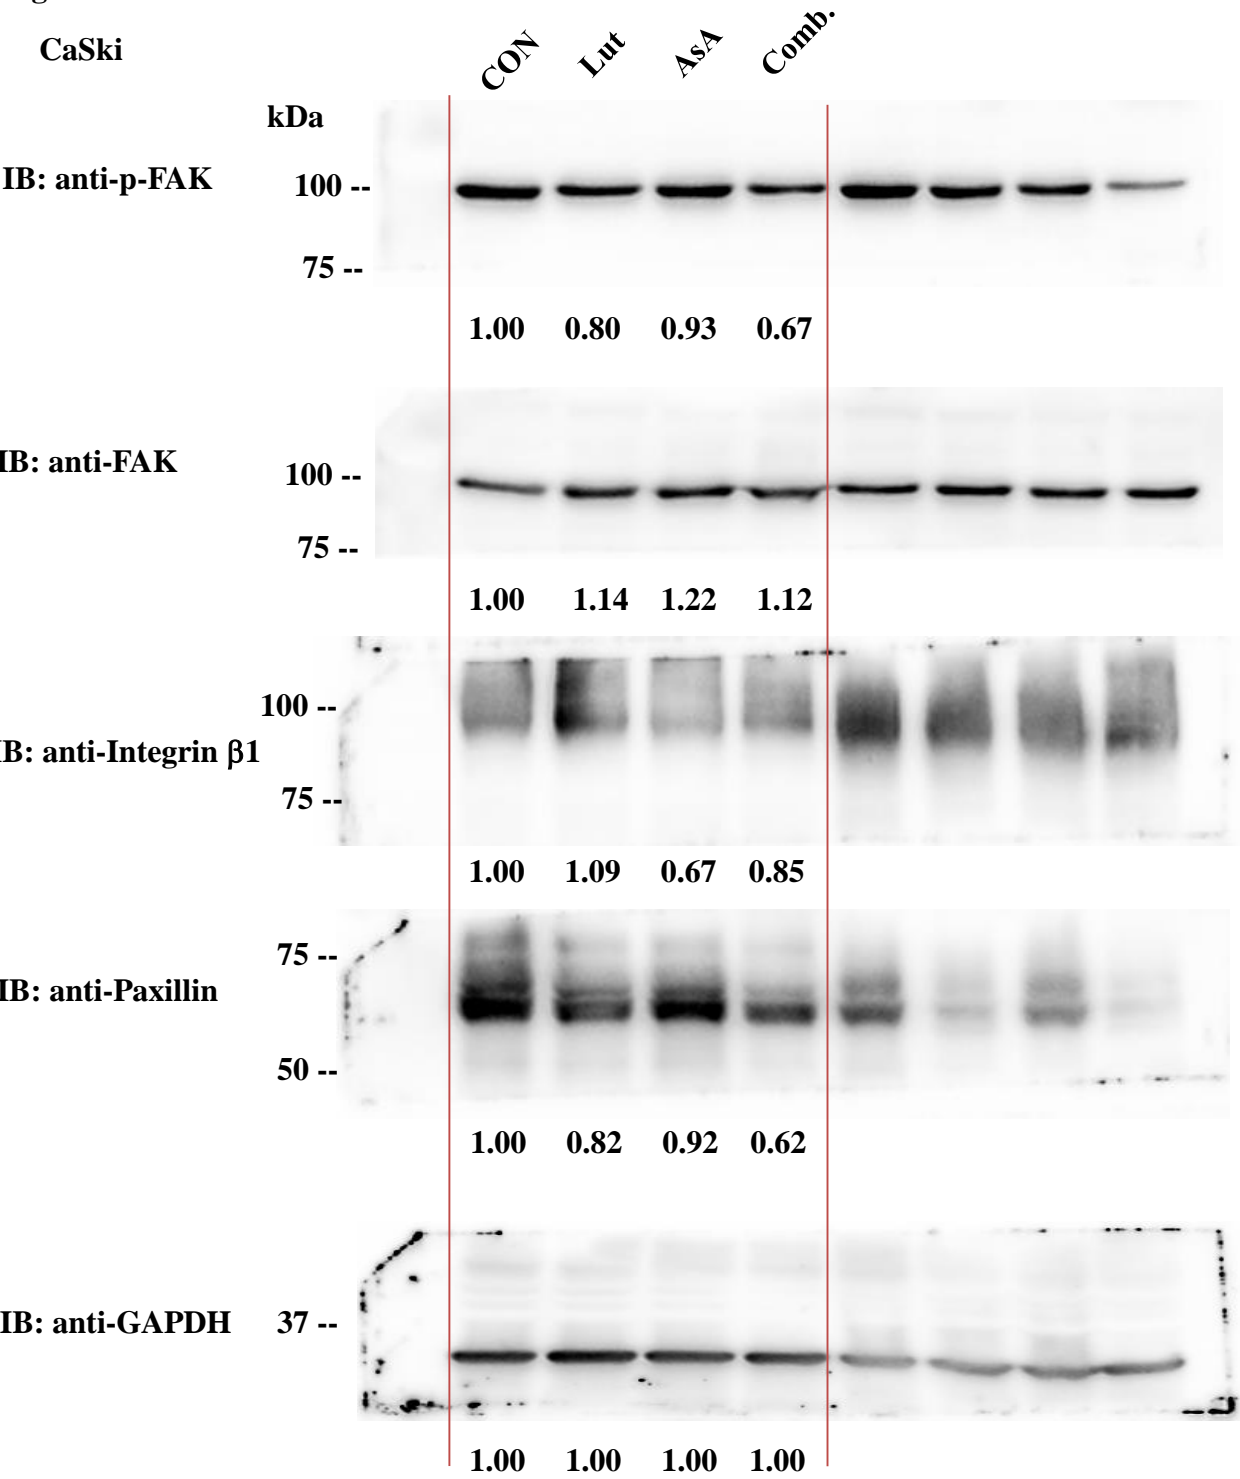

Figure S2B

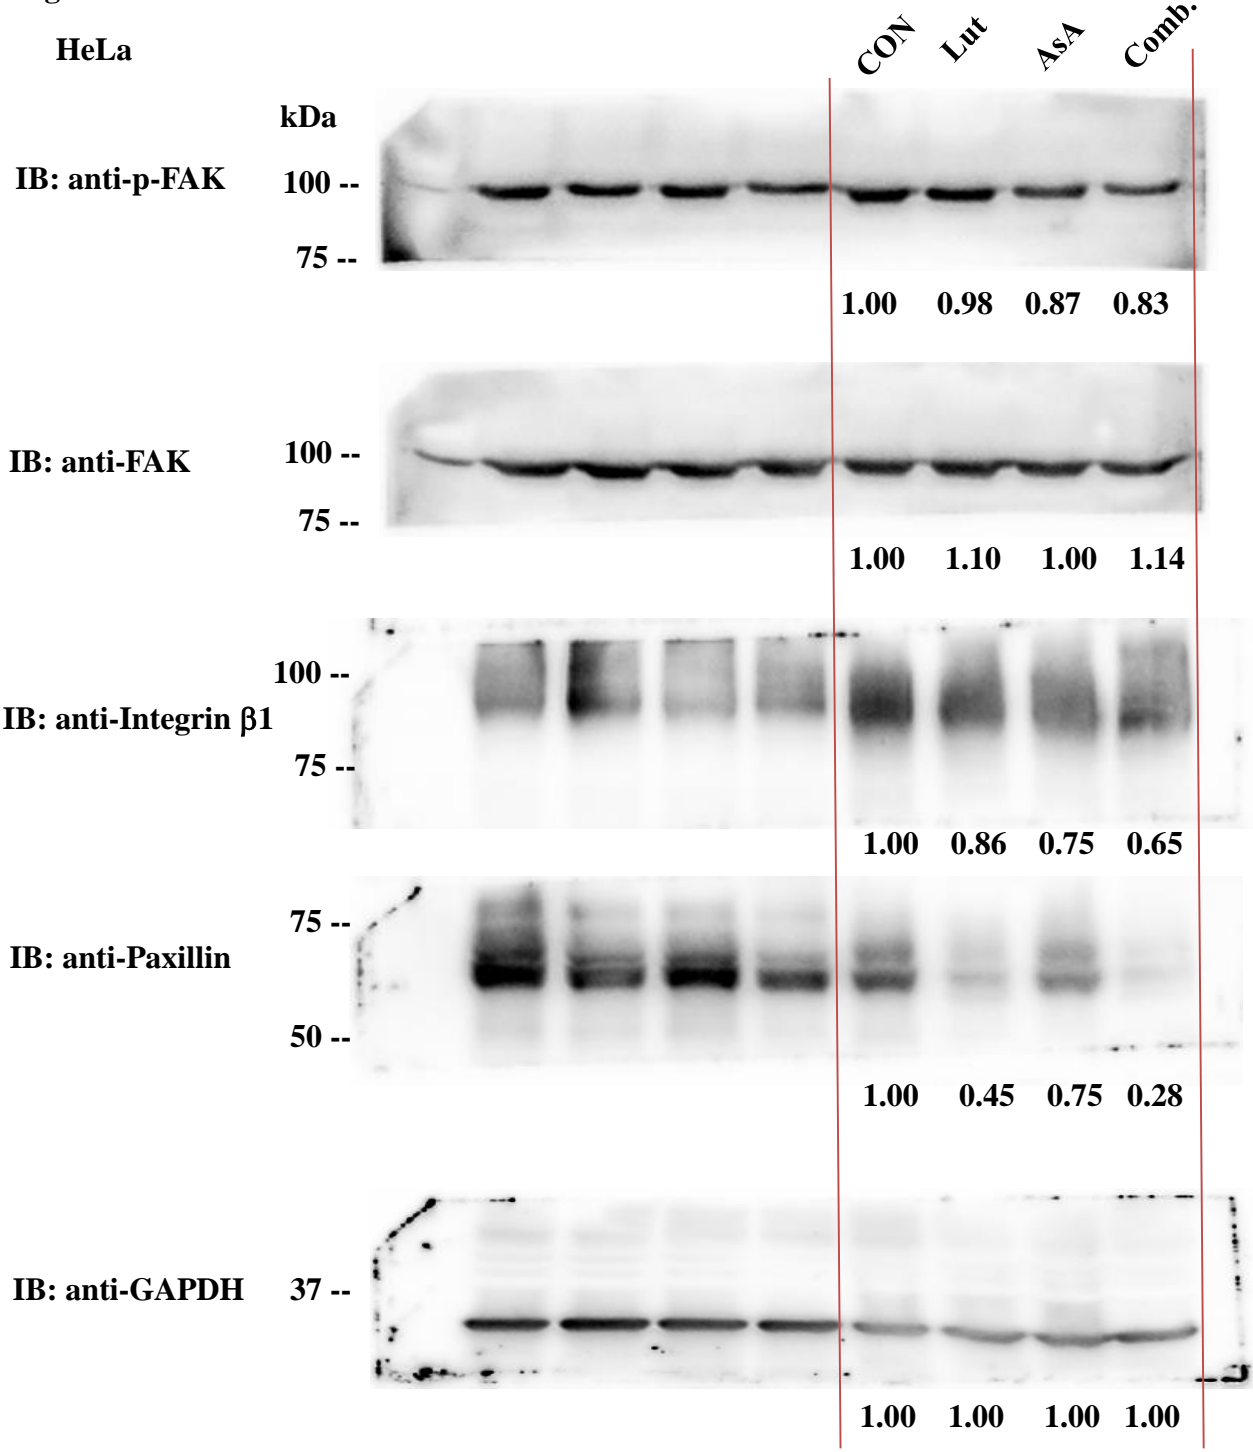

Figure S3A

CaSki

kDa

CON Lut AsA Comb.

IB: anti-PARP-1

100 --

75 --

1.00 1.52 1.10 2.00

IB: anti-Bcl-2

25 --

1.00 0.86 0.93 0.63

IB: anti-Bax

20 --

15 --

1.00 1.38 1.91 2.31

IB: anti-cleaved  
caspase-3

20 --

15 --

1.00 1.61 1.33 2.16

IB: anti-GAPDH

37 --

1.00 1.00 1.00 1.00

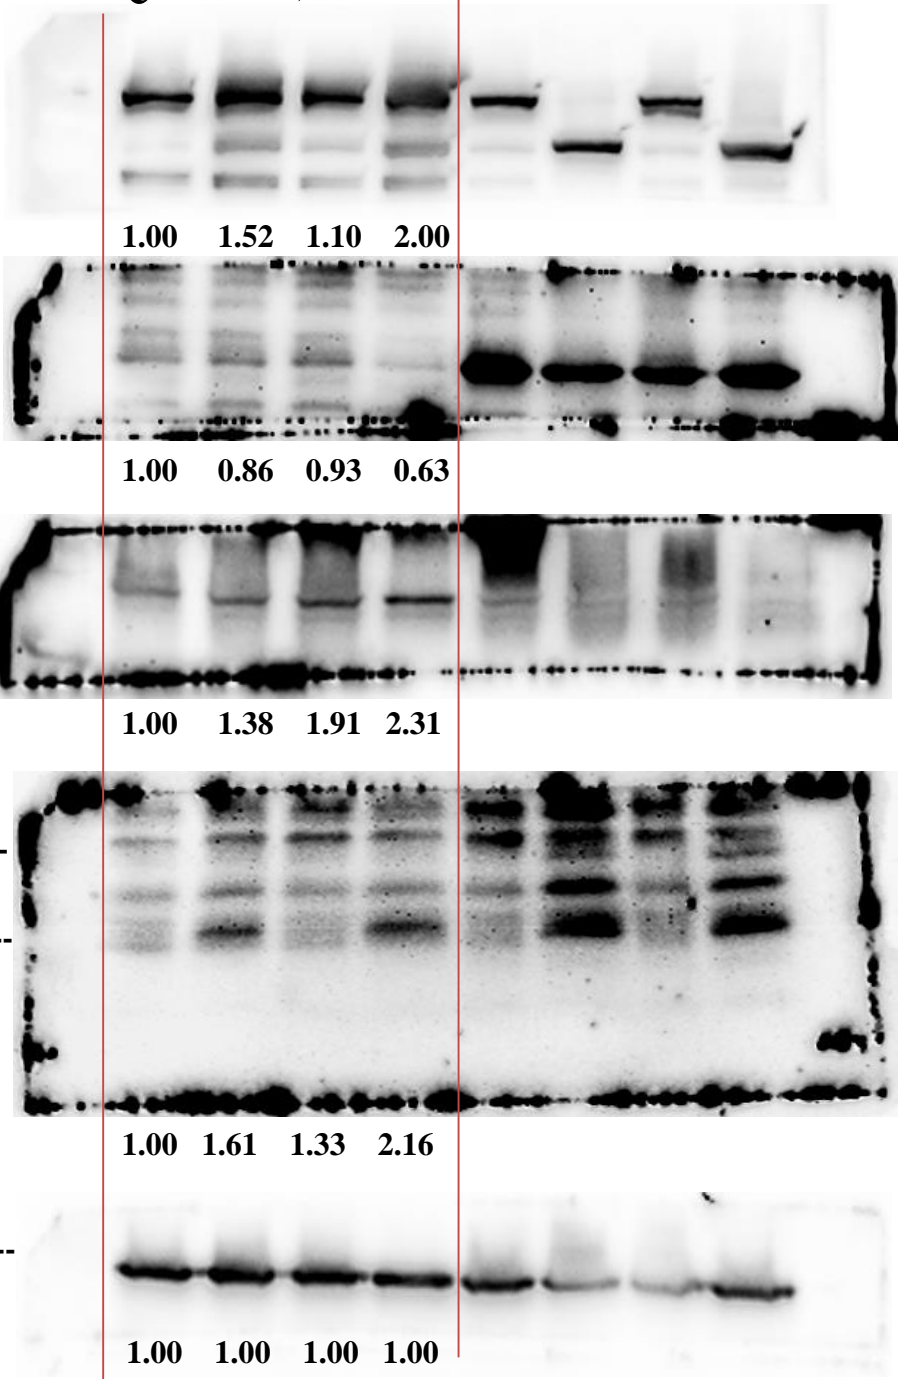

**Figure S3B**

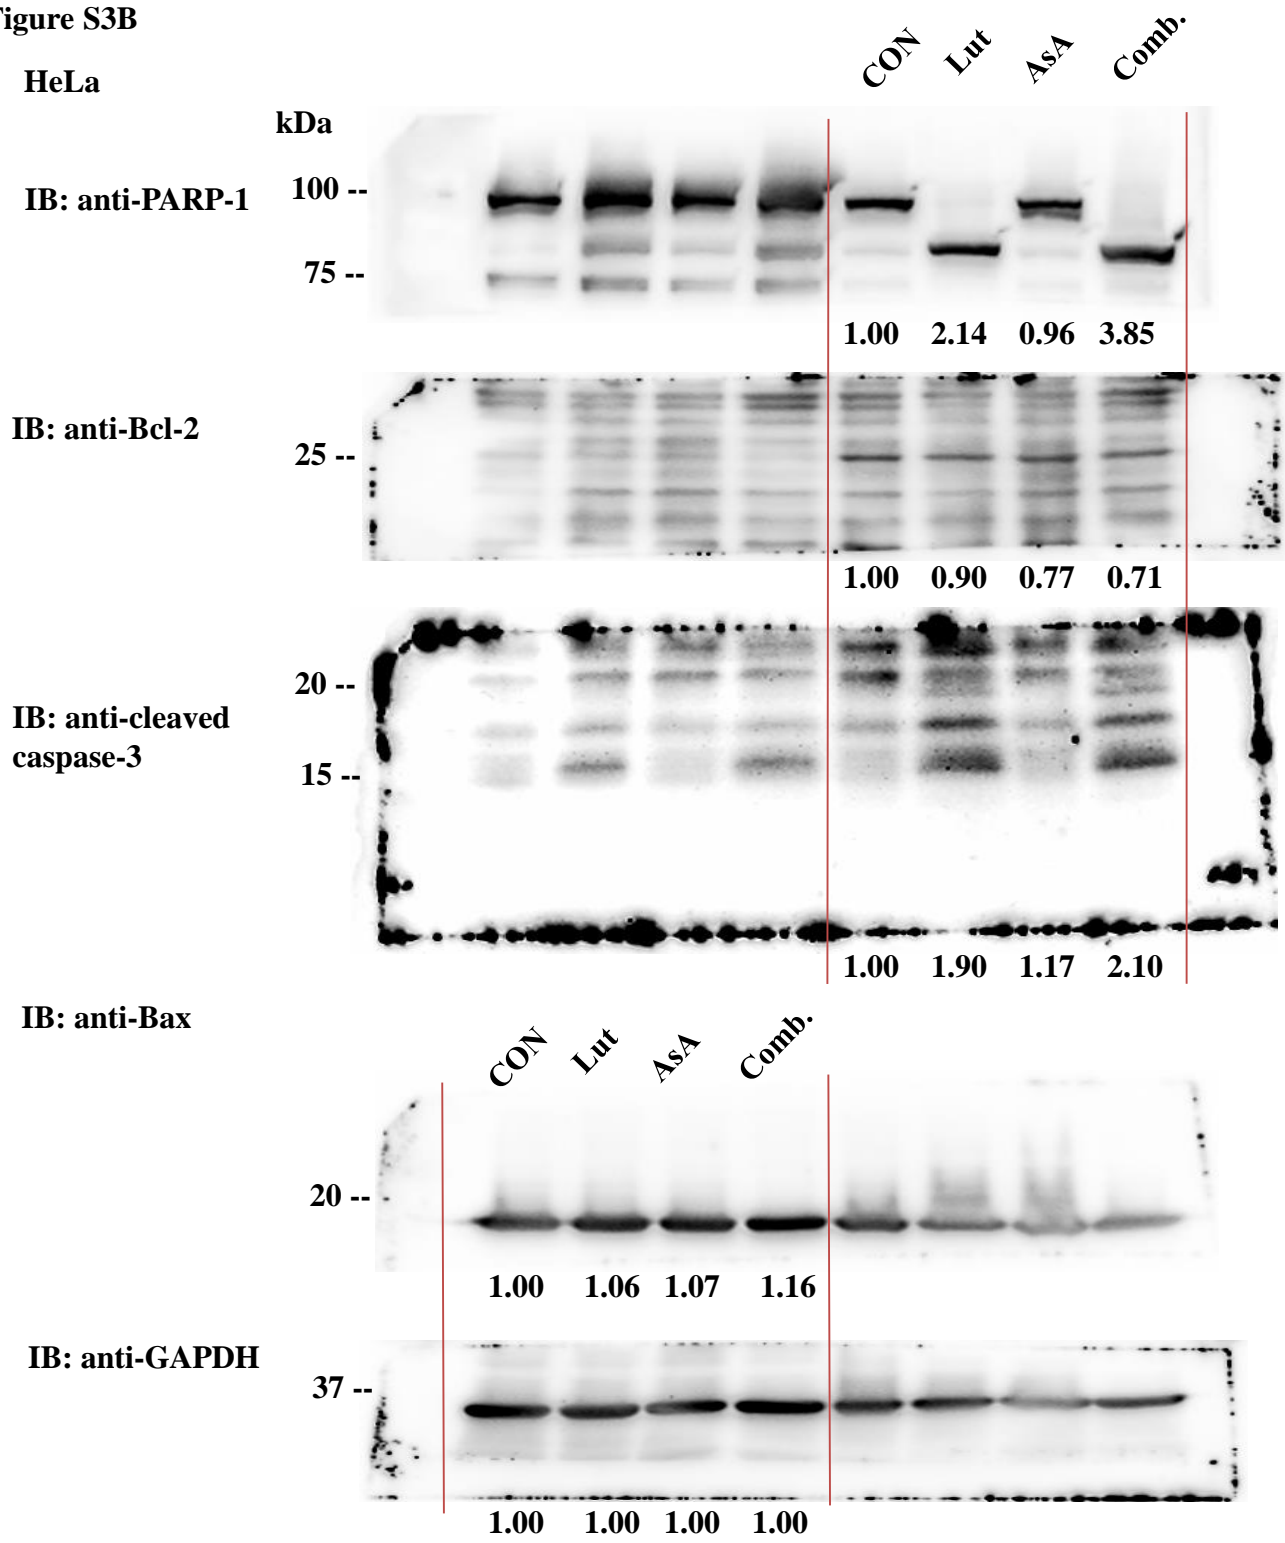

Figure S4A

CaSki

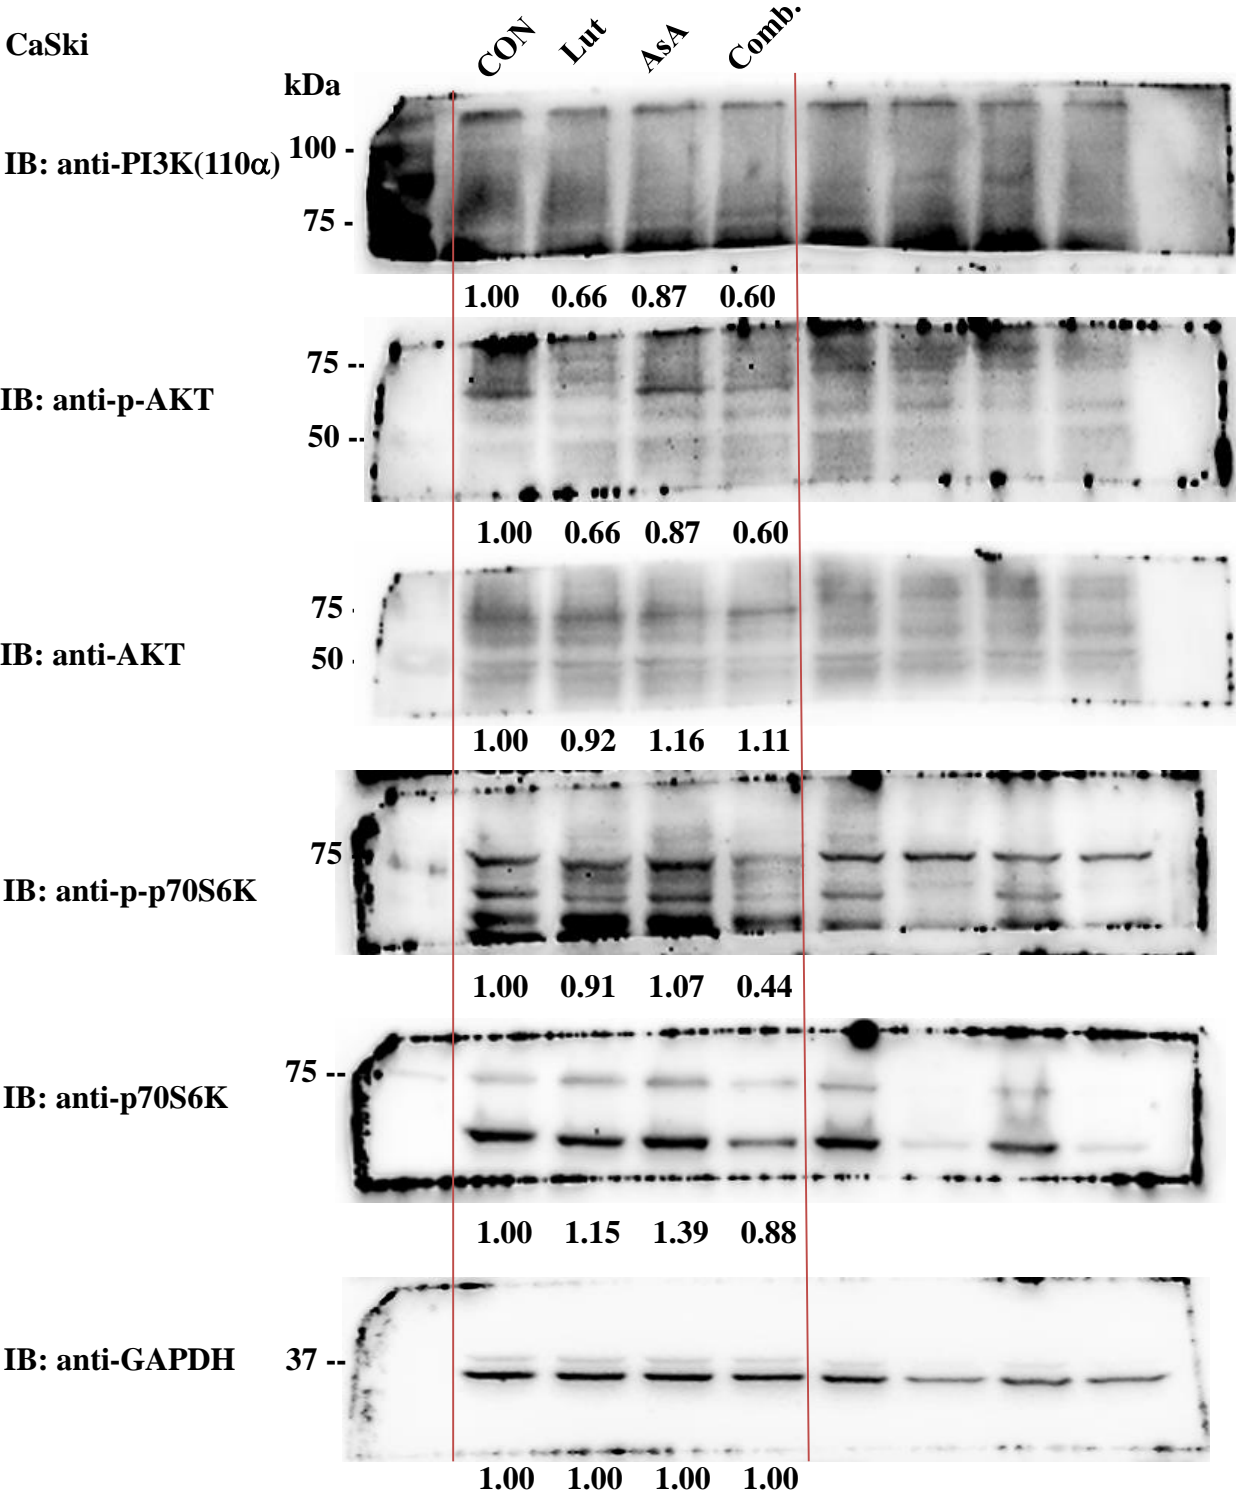

Figure S4B

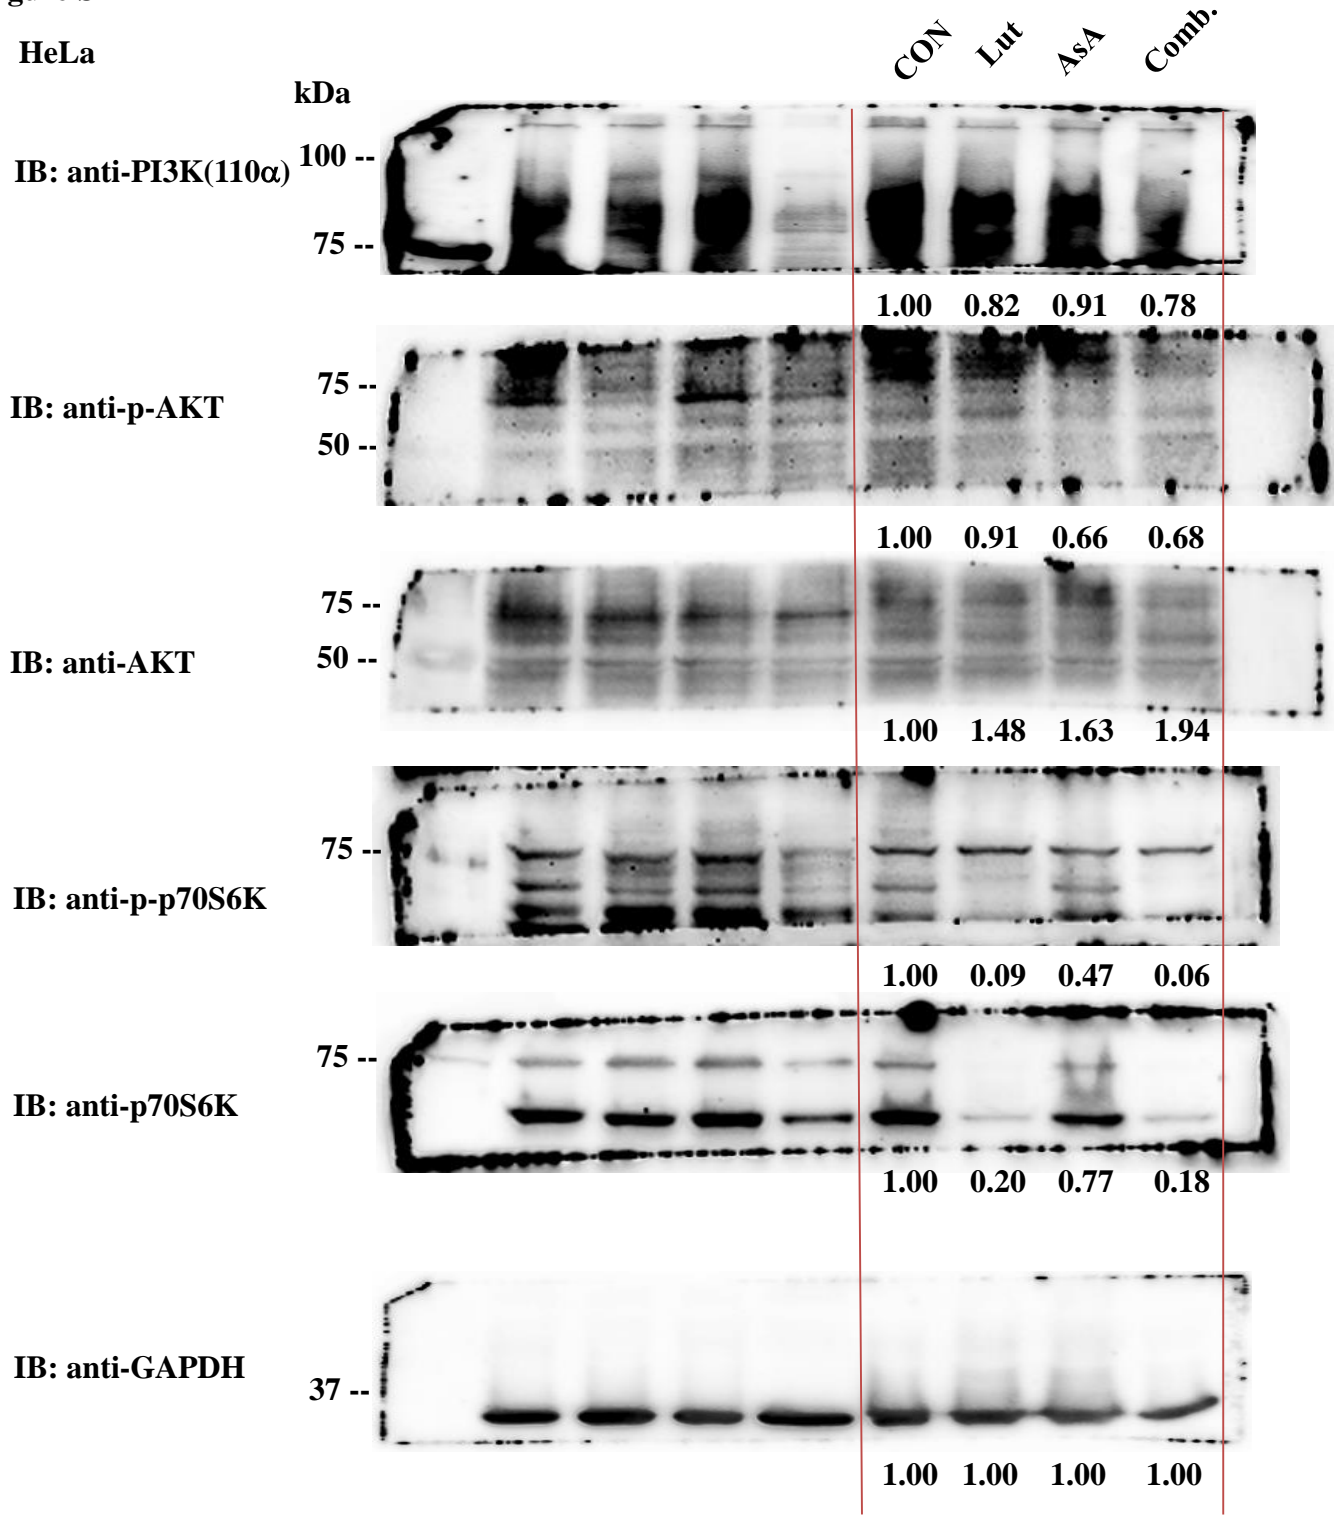

Figure S5A

CaSki

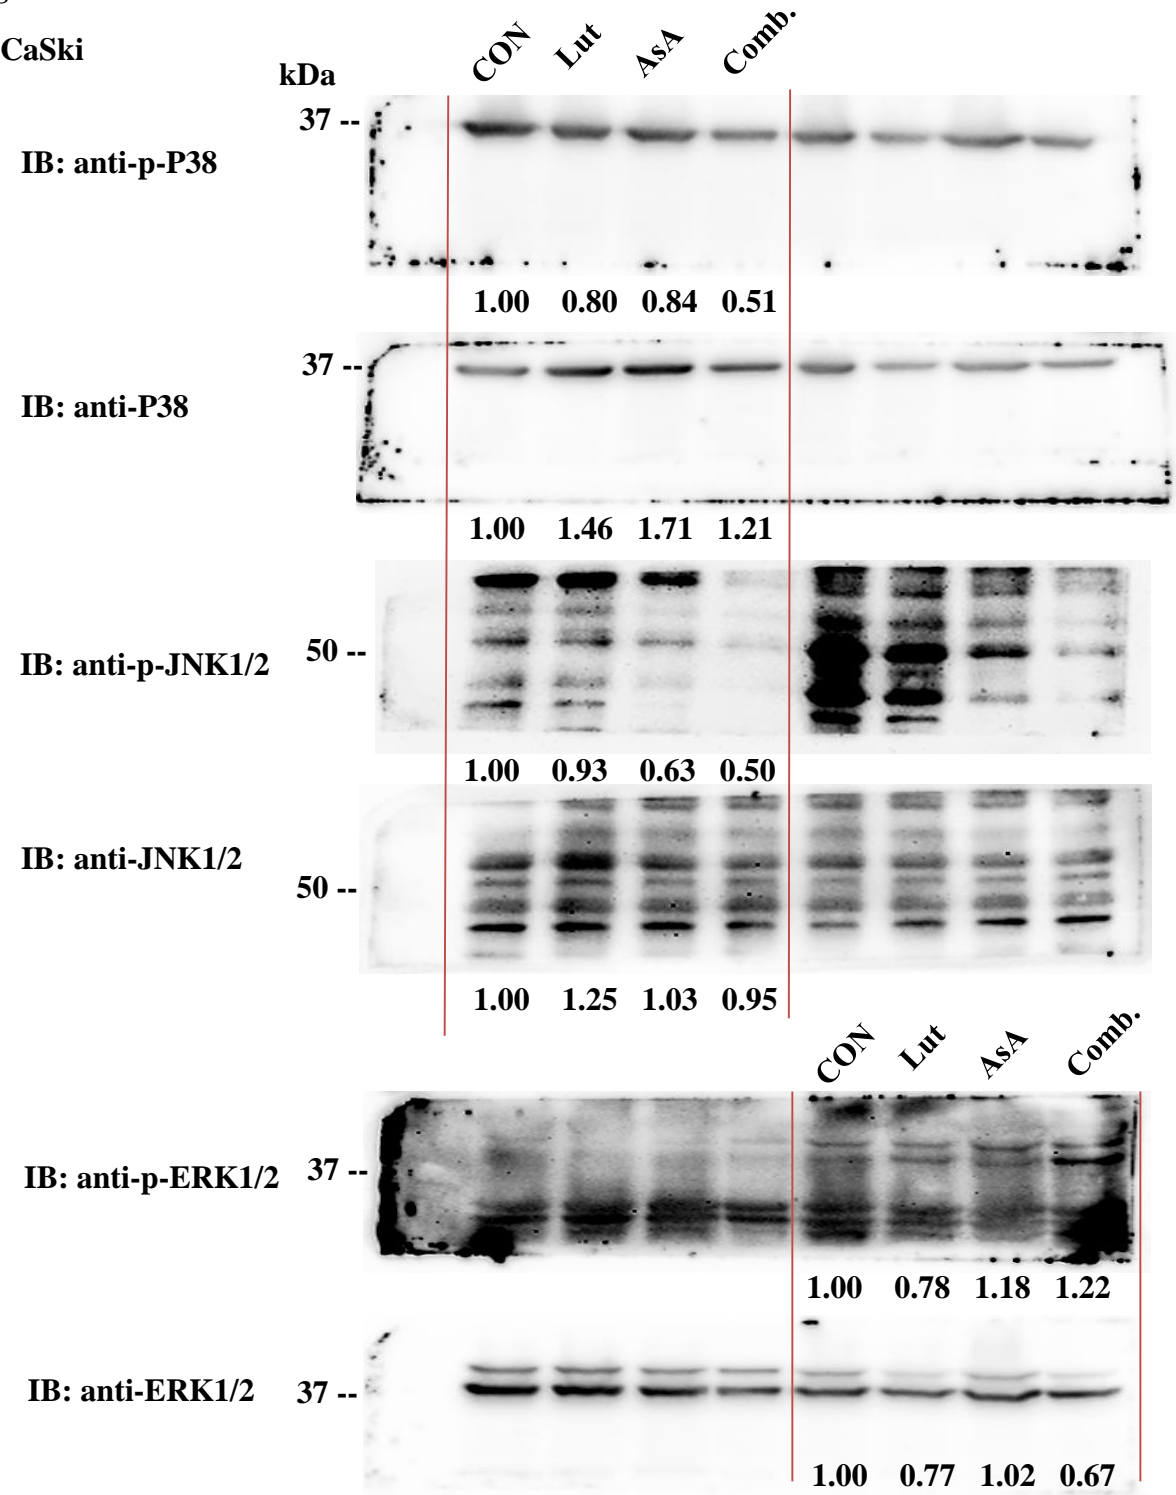

**Figure S5B**

**HeLa**

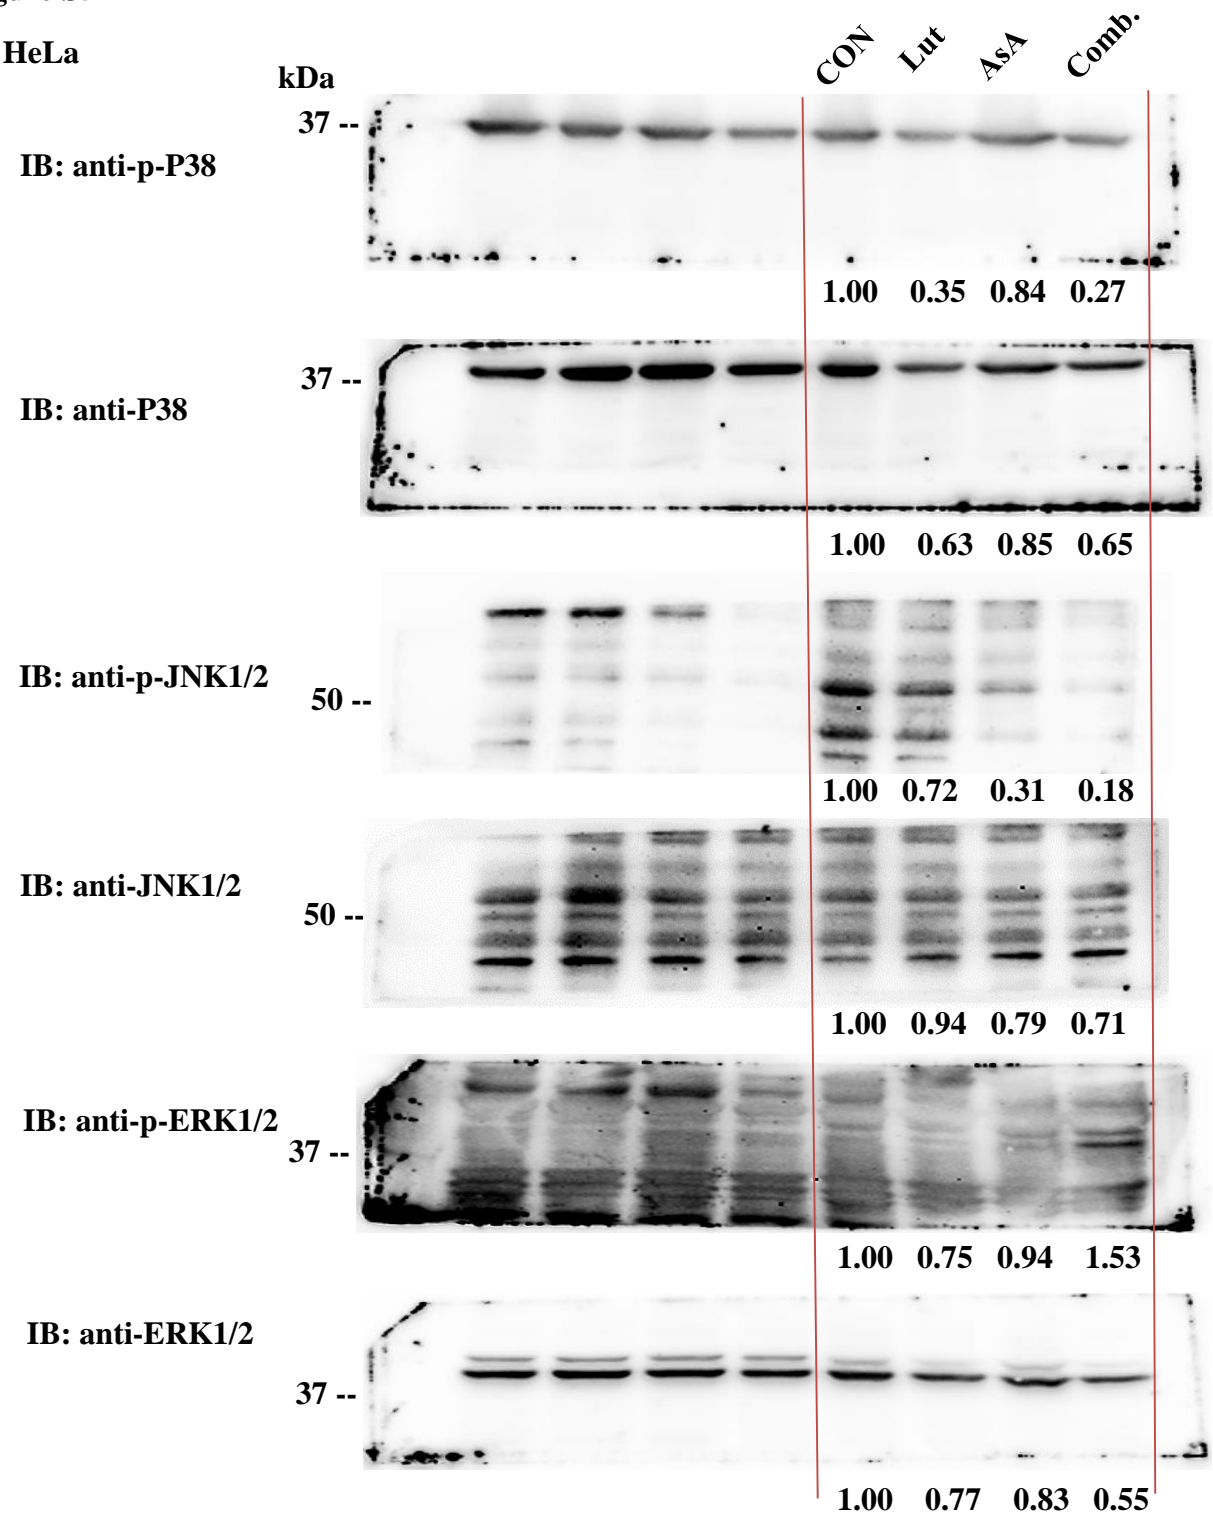

Figure S6A

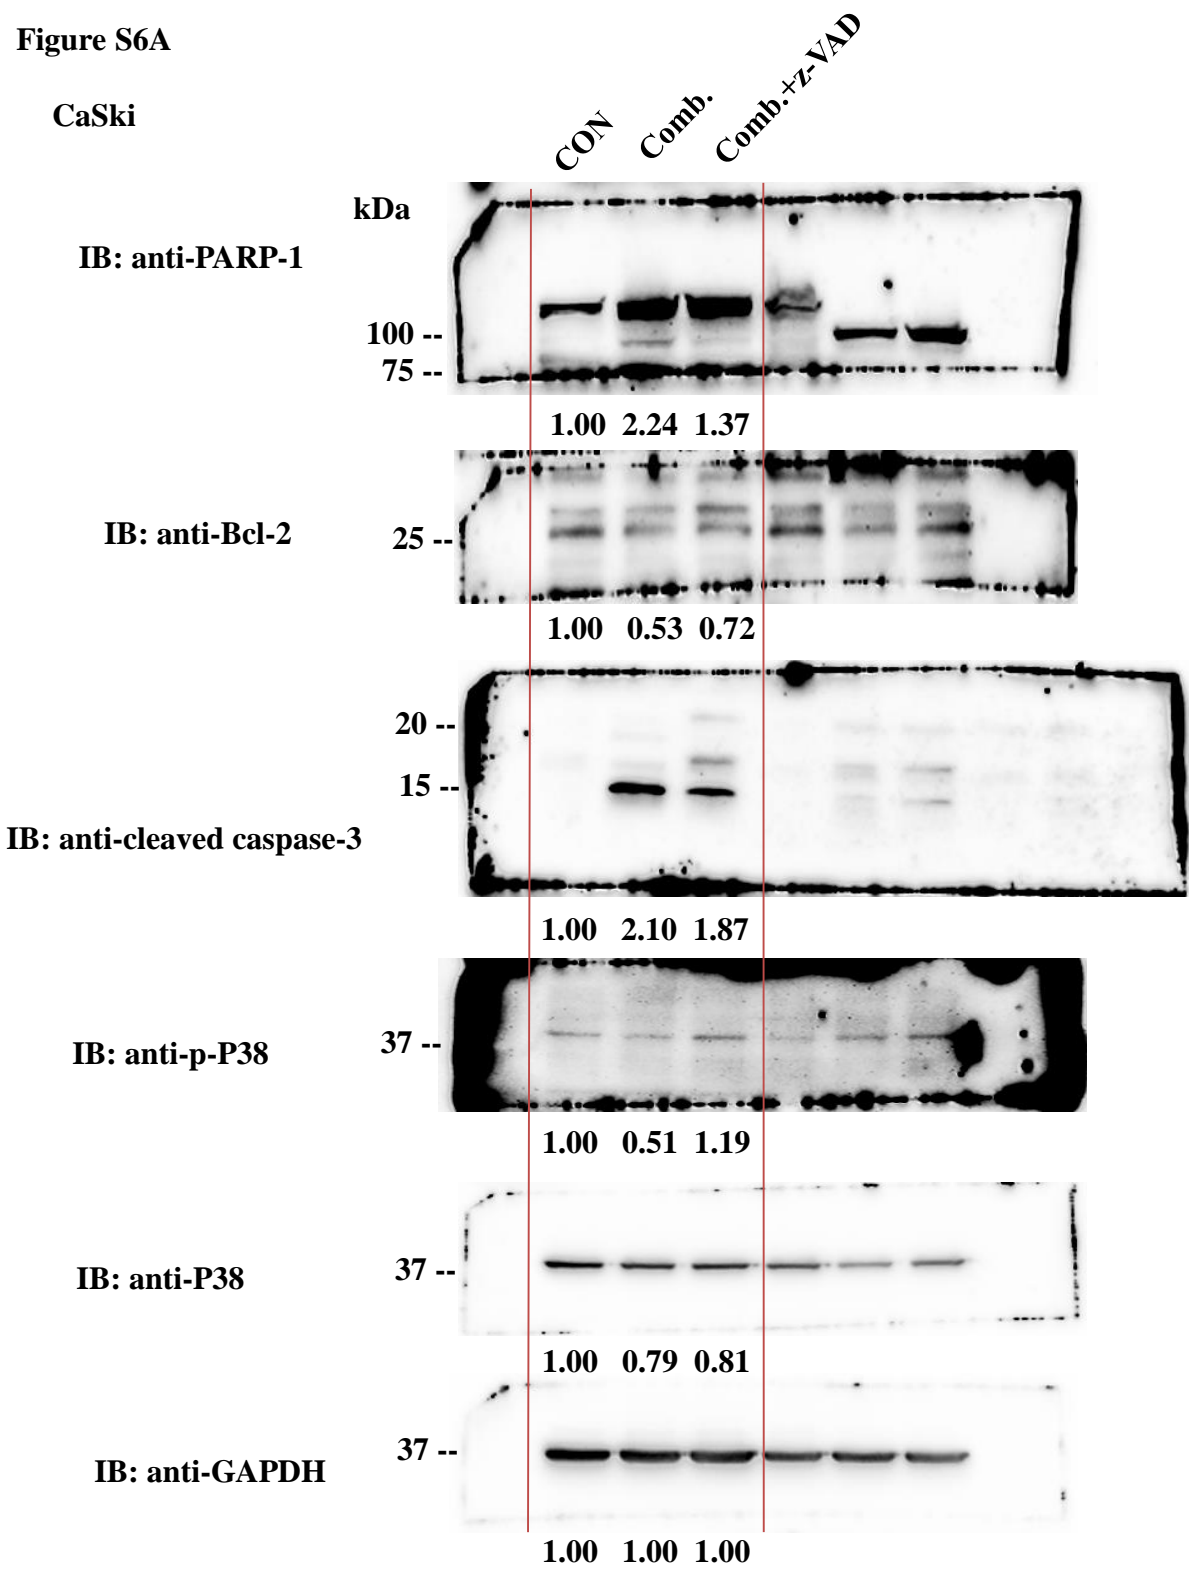

Figure S6B

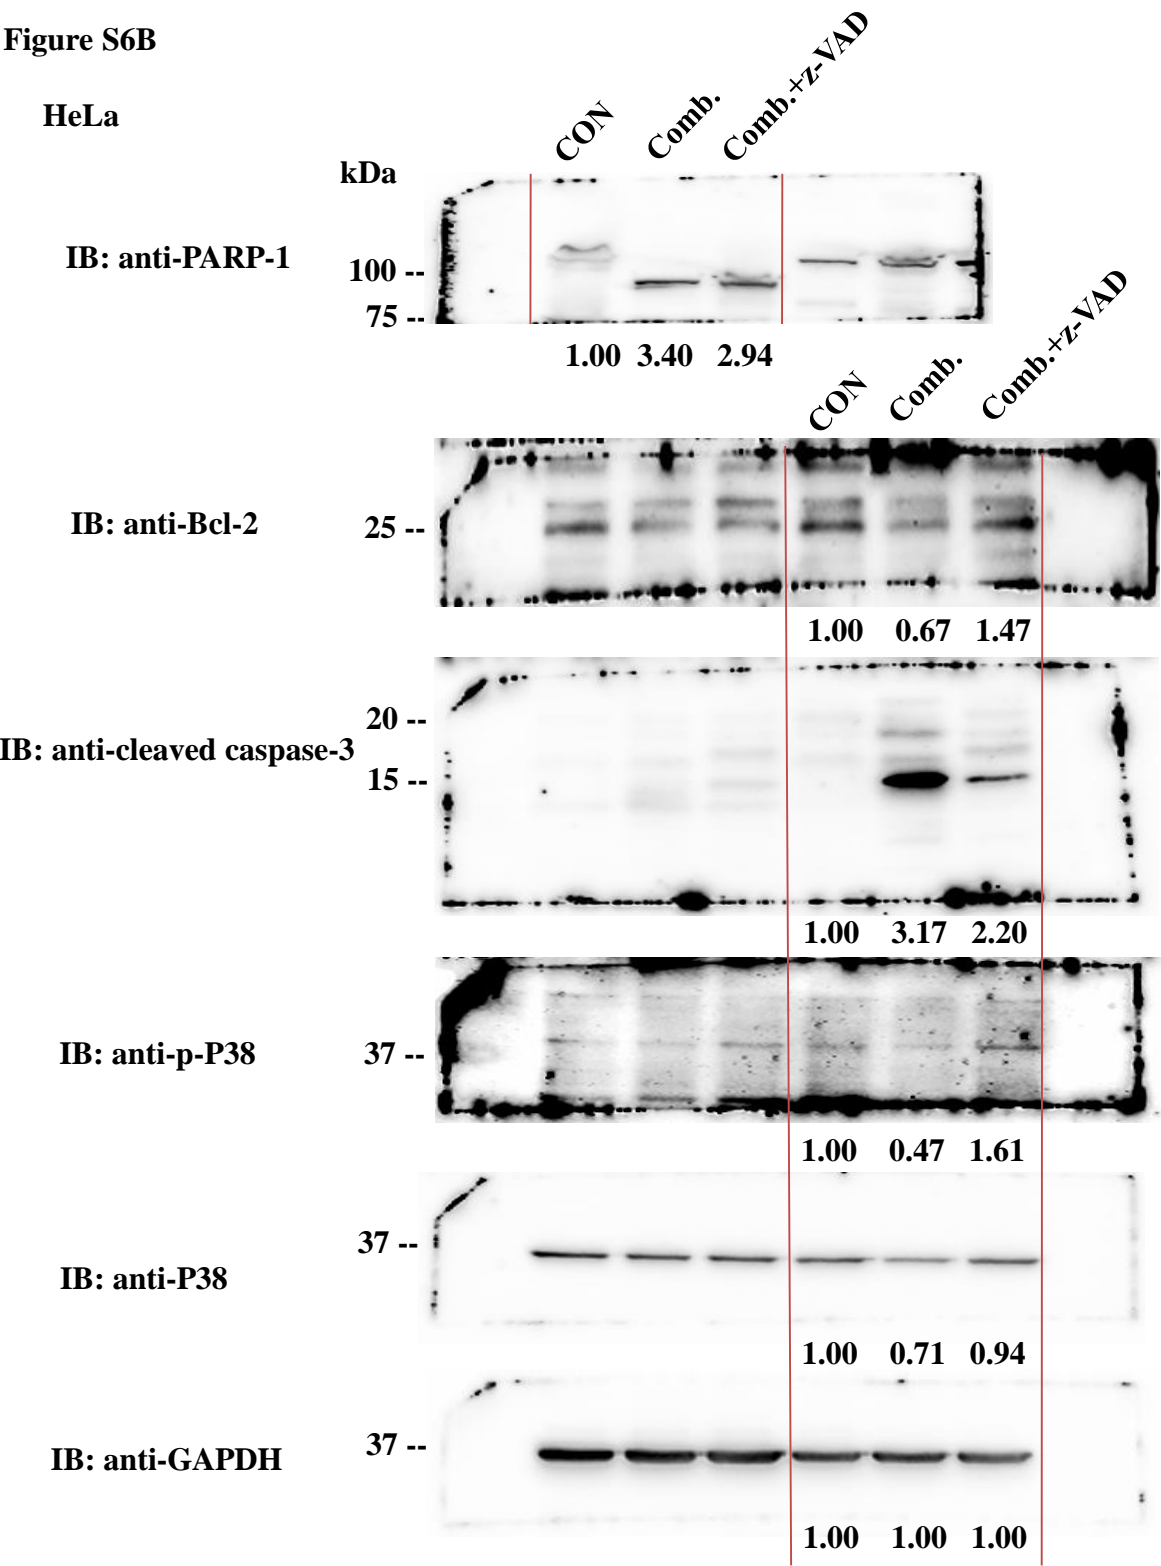

Supplement: s1 [file s1]
